# Supplementary material for: Tumor-targeted dual-action NSAID-platinum(iv) anticancer prodrugs
Source: Royal Society of Chemistry journal article supplement (doi:10.1039/d3qi00968h), 2023-01-01
Supplement: d3qi00968h1.pdf [file d3qi00968h1.pdf]

## Supporting Information

### Tumor-targeted dual-action NSAID-platinum(IV) anticancer prodrugs

Alexander Kastner<sup>1,4†</sup>, Theresa Mendrina<sup>1,2,3†</sup>, Florian Bachmann<sup>1</sup>, Walter Berger<sup>2,3</sup>, Bernhard K. Keppler<sup>1,3</sup>,  
Petra Heffeter<sup>\*2,3</sup> and Christian R. Kowol<sup>\*1,3</sup>

<sup>1</sup> University of Vienna, Faculty of Chemistry, Institute of Inorganic Chemistry, Waehringer Str. 42, 1090 Vienna, Austria.

<sup>2</sup> Center of Cancer Research and Comprehensive Cancer Center, Medical University of Vienna, Borschkegasse 8a, 1090 Vienna, Austria.

<sup>3</sup> Research Cluster “Translational Cancer Therapy Research”, 1090 Vienna, Austria.

<sup>4</sup> University of Vienna, Vienna Doctoral School in Chemistry (DoSChem), Waehringer Str. 42, 1090 Vienna, Austria.

E-Mail: [christian.kowol@univie.ac.at](mailto:christian.kowol@univie.ac.at), [petra.heffeter@meduni.ac.at](mailto:petra.heffeter@meduni.ac.at)

†These authors contributed equally to this work.

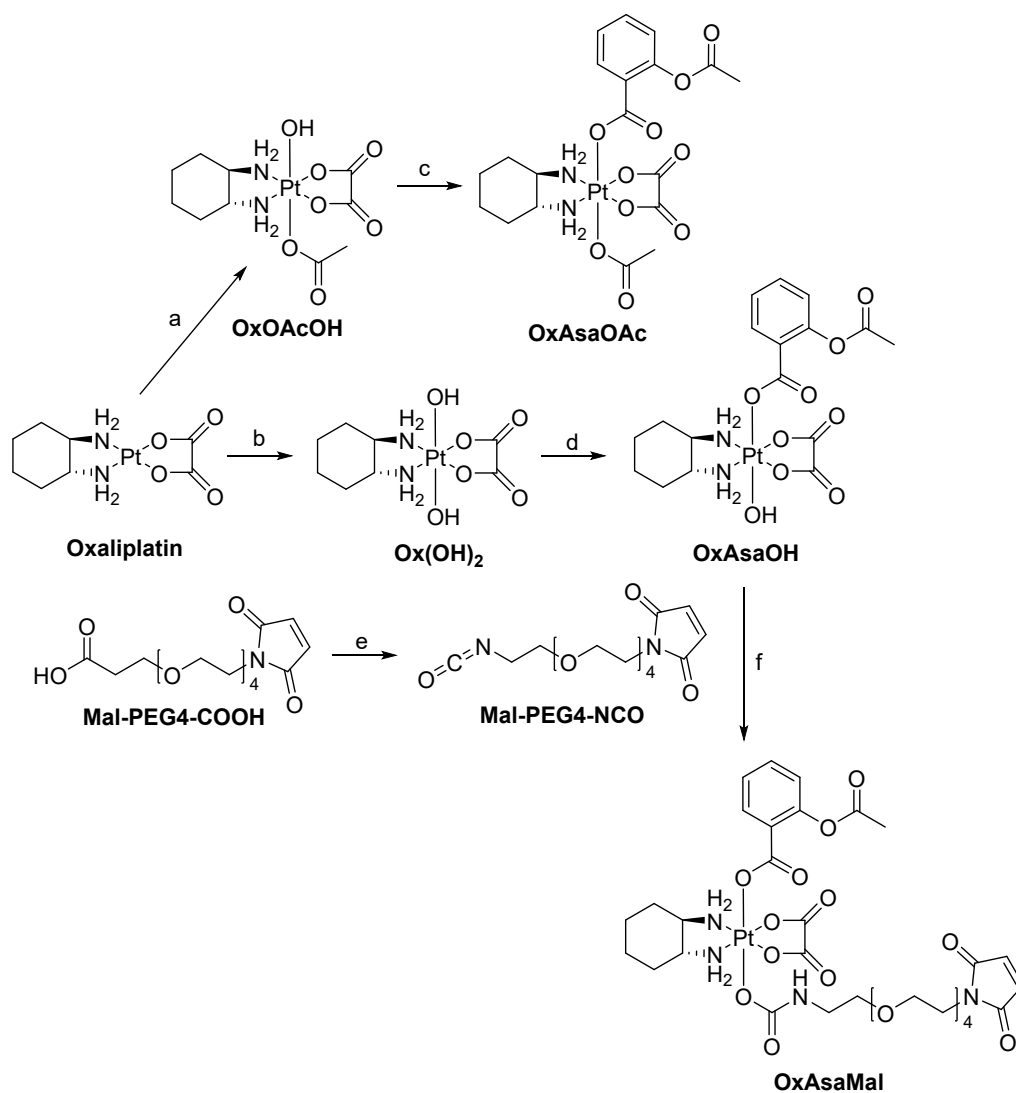

**Scheme S1:** Reaction overview of the synthesized complexes **OxAsaOAc** and **OxAsaMal**. a: H<sub>2</sub>O<sub>2</sub> (50% w/w), AcOH, (45%); b: H<sub>2</sub>O<sub>2</sub> (50% w/w), H<sub>2</sub>O, (98%); c: aspirin anhydride, DMF, (42%); d: aspirin anhydride, DMSO, (86%); e: NEt<sub>3</sub>, ethylchloroformate, NaN<sub>3</sub>, acetone/toluene, (88%); f: Mal-PEG4-NCO, DMSO, (24%).

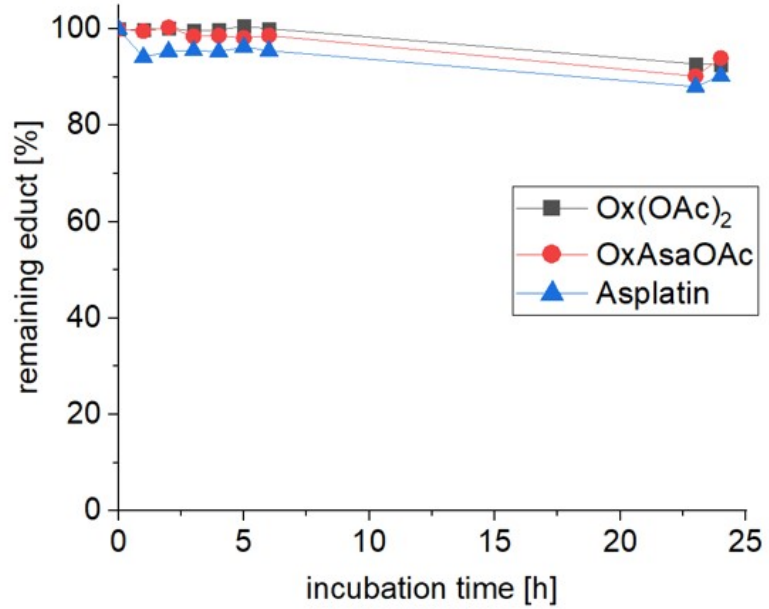

**Figure S1:** Stability of 1 mM **OxAsaOAc**, **Ox(OAc)<sub>2</sub>** and **Asplatin** in 250 mM phosphate buffer (pH = 7.4) at 20°C over 25 h, measured with UHPLC.

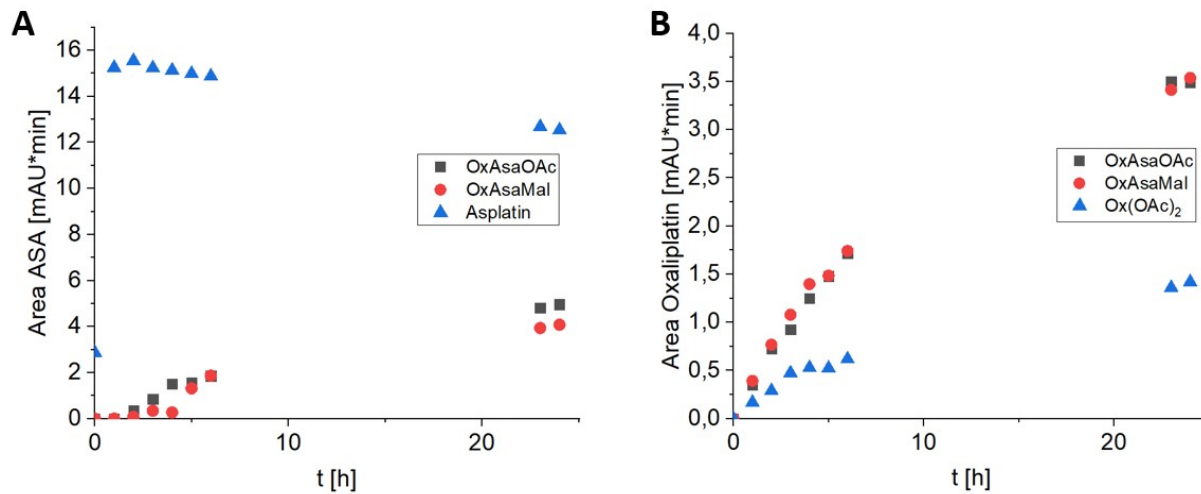

**Figure S2:** Reduction kinetics of 1 mM compound in 250 mM phosphate buffer (pH = 7.4) at 20°C with 10 eq. of ascorbic acid. Measured with HPLC and following (A) the released aspirin and (B) the released oxaliplatin.

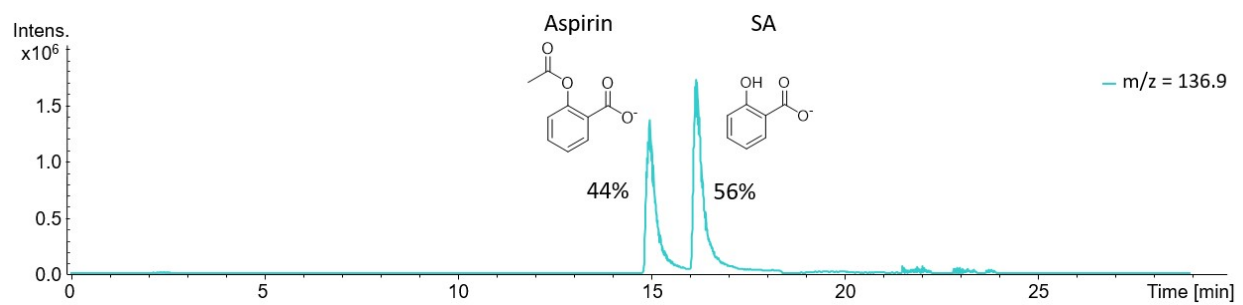

**Figure S3:** HPLC-MS trace of the extracted mouse serum showing the hydrolysis of aspirin. For aspirin (15 min) the same mass ( $m/z = 136.9$ ) as for salicylic acid (SA, 16.2 min) was measured, as the acetate is cleaved during ionization.

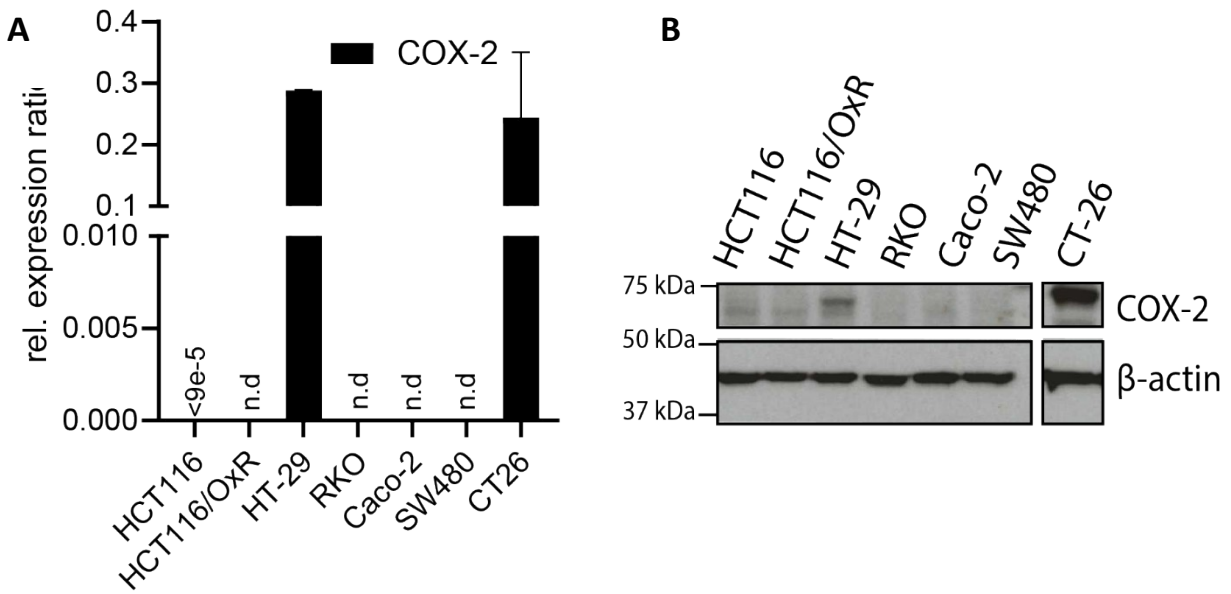

**Figure S4:** COX-2 expression in the cell lines from the test panel. (A) COX-2 mRNA levels of untreated cell lines. Quantification is described as a relative expression compared to  $\beta$ -actin. (n.d = not detected). (B) COX-2 protein expression of untreated cell lines. COX-2 is detected at 72 kDa. As loading control,  $\beta$ -actin (42 kDa) was used.

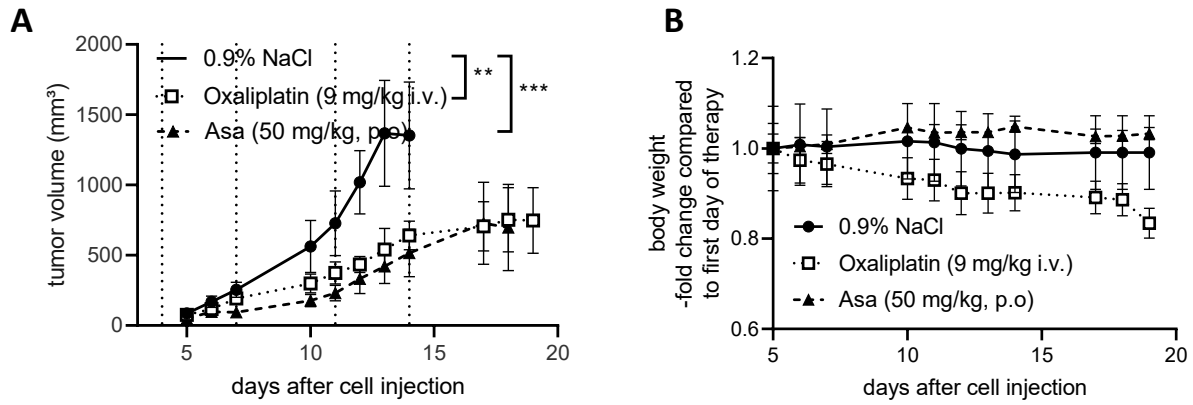

**Figure S5:** Anticancer activity of **oxaliplatin** and **Asa** in vivo. CT26 -bearing BALB/c mice were treated twice a week for two weeks with a concentration of 9mg/kg (i.v.) for oxaliplatin and 50 mg/kg (p.o.) for Asa. (A) Impact on tumor growth; data are presented as means  $\pm$  SEM. Dashed lines indicate treatments days. Statistical significance was calculated by two-way ANOVA and Tukey's multiple comparison test (\*\* $p < 0.01$ , \*\*\* $p < 0.001$ ). (B) Impact on body weight over the treatment period.

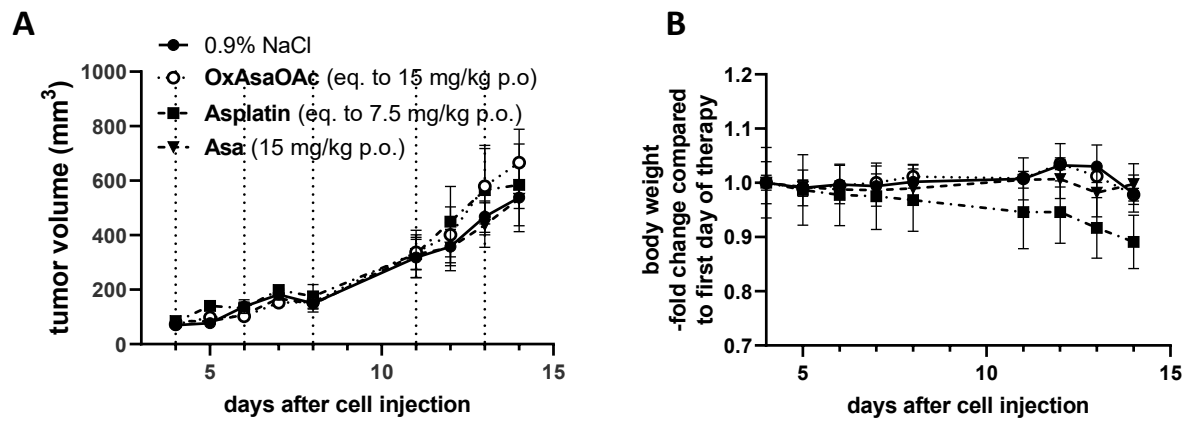

**Figure S6:** Oral anticancer activity of **OxAsaOAc**, **asplatin** and **Asa** in vivo. CT26 -bearing BALB/c mice were treated twice a week for two weeks with a concentration equimolar to of 15 mg/kg Asa in case of OxAsaOAc and 7.5 mg/kg in case of asplatin. (A) Impact on tumor growth; data are presented as means  $\pm$  SEM. Dashed lines indicate treatments days. (B) Impact on body weight over the treatment period.



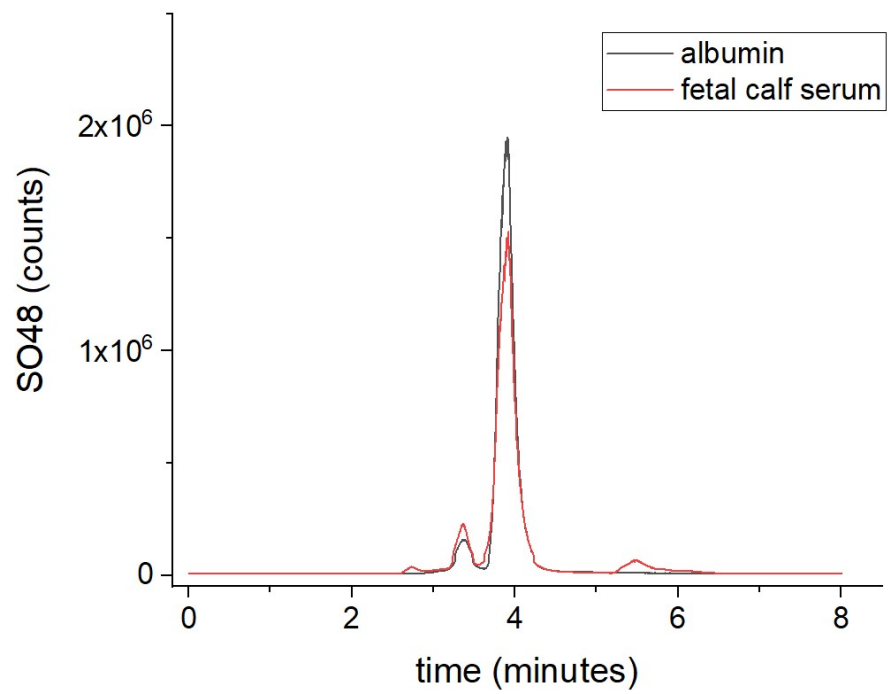

**Figure S7:** Sulfur traces of fetal calf serum (+150 mM phosphate buffer, pH 7.4) as well as pure albumin in phosphate buffer (50 mM, pH 7.4), both measured by SEC-ICP-MS. The small peak at ~3.3 min corresponds to the albumin dimer.

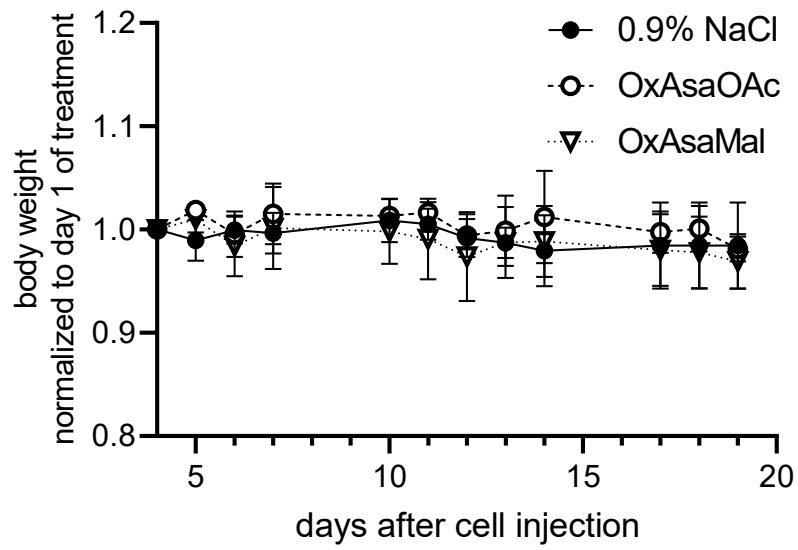

**Figure S8:** Impact on body weight over the treatment period of OxAsaOAc and OxAsaMal (i.v.) in immune-competent Balb/c mice. Mice were treated equimolar to 9 mg/kg oxaliplatin.

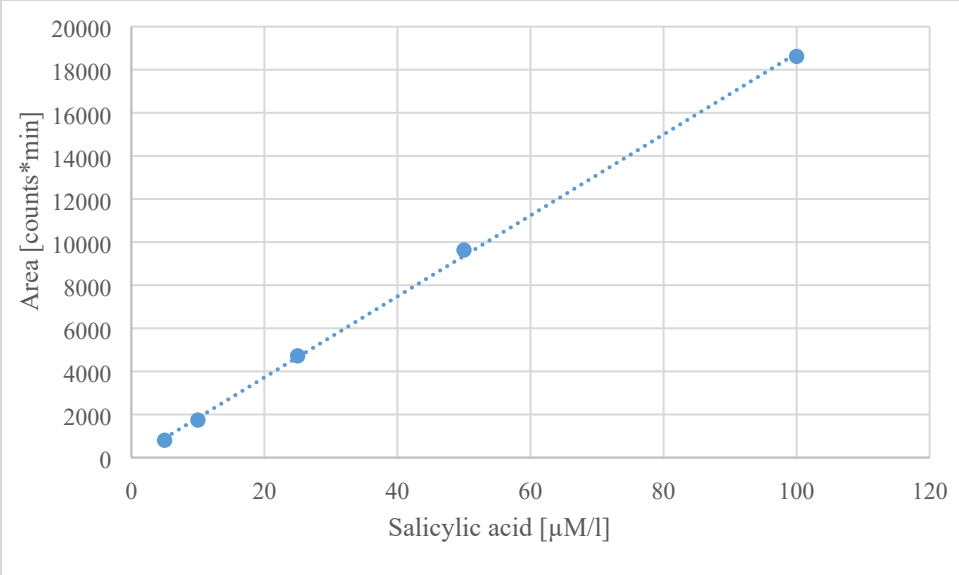

**Figure S9:** Calibration for the extraction of salicylic acid out of biological media.

|                      |                                                           |
|----------------------|-----------------------------------------------------------|
| RF power             | 1550                                                      |
| Nebulizer            | MicroMist                                                 |
| Spray chamber        | Scott double-pass                                         |
| Monitored isotopes   | $^{185}\text{Re}$ , $^{195}\text{Pt}$ , $^{196}\text{Pt}$ |
| Plasma gas           | 15 l/min                                                  |
| Nebulizer gas        | 1.08 l/min                                                |
| Auxiliary gas        | 0.90 l/min                                                |
| Cone material        | Ni                                                        |
| Integration time     | 0.1 s                                                     |
| Number of replicates | 10                                                        |
| Number of sweeps     | 100                                                       |

**Table S1:** ICP-MS parameters for the measurement of platinum levels in cells, tumor- and organ-tissue.

|                          |                                                     |
|--------------------------|-----------------------------------------------------|
| HPLC column:             | Acquity UPLC BEH 200Å 1.7 µm, 4.6x150 mm            |
| Eluent:                  | 50 mM CH <sub>3</sub> COONH <sub>4</sub> , pH = 6.8 |
| Flow rate:               | 400 µL/min                                          |
| Injection volume:        | 5 µL                                                |
| Column temperature:      | 37°C                                                |
| Autosampler temperature: | 37°C                                                |

**Table S2:** SEC-HPLC parameters for SEC-ICP-MS measurements.

|                        |            |
|------------------------|------------|
| Nebulizer:             | Quartz     |
| Spray chamber:         | Scott type |
| Nebulizer gas flow:    | 1.08 L/min |
| Aux. gas flow:         | 0.9 L/min  |
| Plasma gas flow:       | 15 L/min   |
| Reaction gas (oxygen): | 30 %       |
| ICP RF power:          | 1550 W     |
| m/z measured:          | 195, 48    |

**Table S3:** ICP-MS parameters for SEC-ICP-MS measurements.
